# Supplementary material
Source: PubMed Central journal article supplement (PMC10457657)
Supplement: Suppl_FigS1.pdf [file Suppl_FigS1.pdf]

## Supplemental Files

### Supplemental Figures

#### Supplemental Figure S1

##### Indels in ferret *CFTR* G551 locus

|                                                                    |                  |
|--------------------------------------------------------------------|------------------|
| GTCCTTGGAGAAGGTGGAATCACACTGAGTGGTGATCAGCGAGCAAGAATT                | WT               |
| GTCCTTGGAGAAGGTGGAATCACA-TGAGTGGTGATCAGCGAGCAAGAATT                | -1 bases indel   |
| GTCCTTGGAGAAGGTGGAATCACAC-GAGTGGTGATCAGCGAGCAAGAATT                | -1 bases indel   |
| GTCCTTGGAGAAGGTGGAATCAC--TGAGTGGTGATCAGCGAGCAAGAATT                | -2 bases indel   |
| GTCCTTGGAGAAGGTGG-----TGAGTGGTGATCAGCGAGCAAGAATT                   | -8 bases indel   |
| GTCCTTGGAGAAGGTGGAA-----AGCGAGCAAGAATT                             | -14 bases indel  |
| GTCCTTGGAGAAGGTGGA-----CAGCGAGCAAGAATT                             | -14 bases indel  |
| GTCCT-----TGAGTGGTGATCAGCGAGCAAGAATT                               | -19 bases indel  |
| GTCCTTGGAGAAG-----CAGCGAGCAAGAATT                                  | -23 bases indel  |
| GTCCTTGGAGAAGGT-----                                               | -34 bases indels |
| GTCCTTGGAGAAGGTGGAATCACACCTGAGTGGTGATCAGCGAGCAAGAATT               | +1 base indel    |
| GTCCTTGGAGAAGGTGGAATCACACTTGAGTGGTGATCAGCGAGCAAGAATT               | +1 base indel    |
| GTCCTTGGAGAAGGTGGAATCACACCTTGAGTGGTGATCAGCGAGCAAGAATT              | +2 bases         |
| GTCCTTGGAGAAGGTGGAATCACACTTGAGTGGTGATCAGCGAGCAAGAATT               | +2 bases         |
| GTCCTTGGAGAAGGTGGAATCACCCCTGAGTGGTGATCAGCGAGCAAGAATT               | +3 bases         |
| GTCCTTGGAGAAGGTGGAATCACACTTCTCCATCTTGGAGAGAGTGGTGATCAGCGAGCAAGAATT | +15 base indels  |

**Suppl. Figure S1. Representative indel sequences at the gRNA targeting sites of ferret *CFTR* gene.**
