# Supplementary material
Source: PubMed Central journal article supplement (PMC10457657)
Supplement: Suppl_FigS2.pdf [file Suppl_FigS2.pdf]

## Supplemental Figure S2

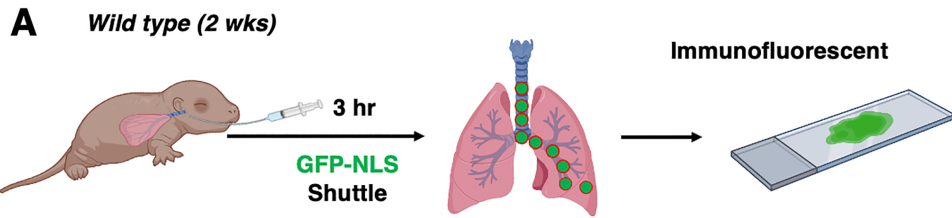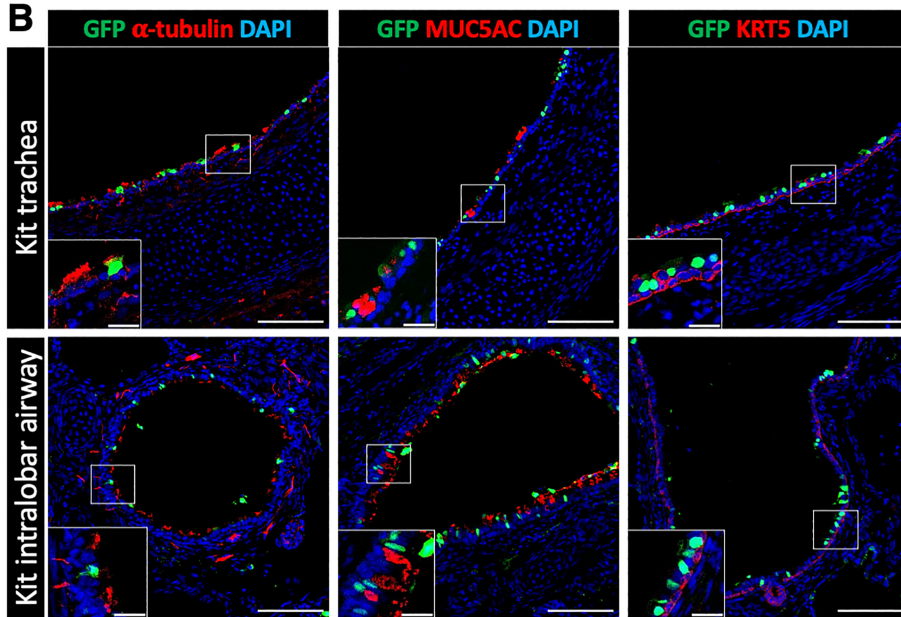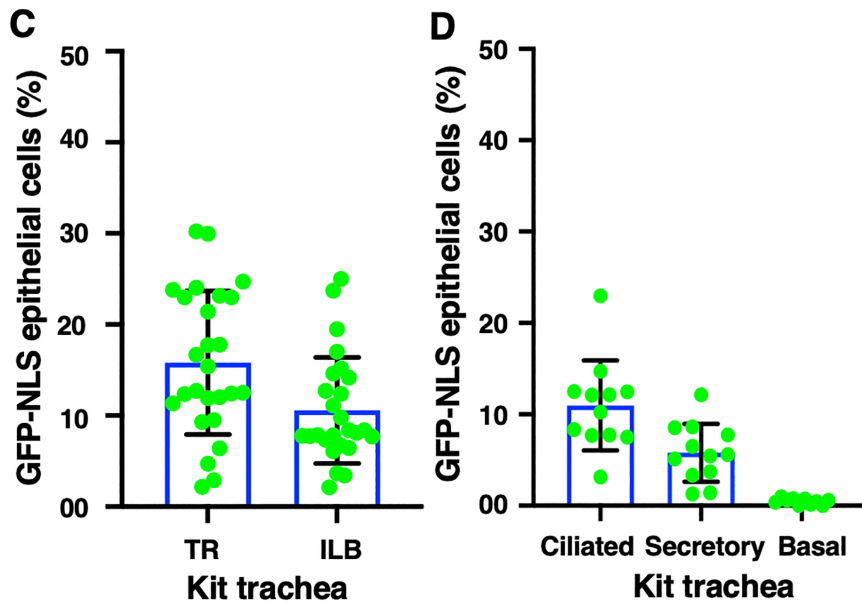

**Suppl. Figure S2. Efficiency and distribution of S10 shuttle peptide-mediated D-Retro-inverso sequence of a NLS (DRI-NLS) peptide in ferret airway epithelia.** (A) Schematic showing the experimental workflow for the delivery Alexa Fluor 647 conjugated DRI-NLS (DRI-NLS-647) peptide into ferret airways by S10 shuttle peptides. The DRI-NLS-647 peptide (10 $\mu$ M) was delivered by S10 (20 $\mu$ M) to wildtype ferret airways at a dose of 1.0 mL/kg *via laryngotracheal route*. The transfection efficiency and distribution of epithelial cell types was evaluated at 30min post the delivery by an immunolocalization assay. (B) Representative image of epi-fluorescent DRI-NLS peptide (magenta) in adult (top panel) and kit (bottom) ferret tracheal epithelia (top panel) transfected by S10 shuttle peptides. (C) Representative images of immunolocalization of epi-fluorescent DRI-NLS-647 peptide (gray) and ciliated cell marker ( $\alpha$ -tubulin, red) and goblet cell marker (MUC5AC, green) in ILB epithelia of adult ferret lung. Insets showing the enlargement of boxed area of corresponding image. (ci) The enlarged image of boxed area of corresponding image in C. (D) Representative image of immunolocalization of epi-fluorescent DRI-NLS-647 peptide (gray) and ciliated cell marker ( $\alpha$ -tubulin, red) and goblet cell marker (MUC5AC, green) in bronchial epithelia of kit ferret. (E) The efficiency of delivery of DRI-NLS peptide in adult ferret trachea and ILB by S10. (F) The efficiency of delivery of DRI-NLS peptide in kit ferret trachea and ILB by S10. (G) The frequency of multiple epithelial cell types transfected with DRI-NLS peptide in adult ferret airways by S10. (H) The frequency of multiple epithelial cell types transfected with DRI-NLS peptide in kit ferret airways by S10. Nuclei were counterstained with DAPI in B-D. Bars, 100 $\mu$ m in B C and D, 20 $\mu$ m in ci and inset of C. Data in E, F, G and H represented mean  $\pm$  SD from 30 (N=30), 26 (N=26), 28 (N=28) and 34 (N=34) sections from 3 ferrets, and was evaluated by Student *t*-test, respectively.
