# Supplementary material
Source: PubMed Central journal article supplement (PMC10457657)
Supplement: Suppl_TableS1.pdf [file Suppl_TableS1.pdf]

## Supplemental Tables

### Supplemental Table S1. sgRNA sequences

| Cas nuclease                                       | gRNA sequence to LoxP site          |
|----------------------------------------------------|-------------------------------------|
| SpCas9                                             | 5'-CATTATACGAAGTTATATTA-3'          |
| AsCas12a (Cpf1)                                    | 5'-GTATAATGTATGCTATACGAA-3'         |
| Ferret CFTR G551D                                  | 5'- GAAGGTGGAATCACACTGAG-3'         |
| Primer sequences to amplify ferret CFTR G551D site |                                     |
| Ferret CFTR G551D Forward                          | 5'-AGGCGCCCCTGGAGATTTCC-3'          |
|                                                    | 5'-CATGGTCATGAAGGACATTC-3'          |
| Ferret CFTR G551D Reverse                          | 5'-AACTAGGAAGTAGAAGTAGAAGCAGAAGC-3' |
