# Supplementary material
Source: PubMed Central journal article supplement (PMC10457657)
Supplement: Suppl_TableS2.pdf [file Suppl_TableS2.pdf]

## Supplemental Table S2. List of primary antibodies

| <b>Antigen</b>       | <b>Vendor</b>             | <b>Cat #</b> | <b>Host</b> | <b>Cell markers</b> |
|----------------------|---------------------------|--------------|-------------|---------------------|
| Acetyl-alpha-Tubulin | Cell Signaling Technology | 5335S        | Rabbit      | Ciliated            |
| Cytokeratin 5        | Biologend                 | 905901       | Chicken     | Basal               |
| MUC5AC               | Thermofisher              | MS-145-PO    | Mouse       | Secretory           |
| SCGB1A1              | Millipore Sigma           | ABS1673      | Goat        | Secretory           |
| SFTPC (SPC)          | Aviva syst bio            | ARP41512     | Rabbit      | Alveolar type II    |
